# Supplementary material for: Dielectric properties of silver nanoparticles coated with silica shells of different thicknesses
Source: Royal Society of Chemistry journal article supplement (doi:10.1039/c3ra23192e), 2013-01-01
Supplement: c3ra23192e.pdf [file c3ra23192e.pdf]

# Dielectric properties of silver nanoparticles coated with silica shells of different thicknesses

Jose Enrico Q. Quinsaat,<sup>a,b</sup> Frank A. Nüesch,<sup>a</sup> Heinrich Hofmann,<sup>b</sup> Dorina M. Opris<sup>a\*</sup>

<sup>a</sup>Swiss Federal Laboratories for Materials Science and Technology Empa, Laboratory for Functional Polymers, Ueberlandstr. 129, CH-8600, Dübendorf, Switzerland, and <sup>b</sup>Ecole Polytechnique Fédérale de Lausanne (EPFL), Materials Institute, Powder Technology Laboratory (LTP), 1015 Lausanne, Switzerland

[dorina.opris@empa.ch](mailto:dorina.opris@empa.ch)

## Supporting Information

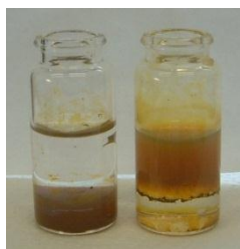

**Figure 1.** Wettability test in water/toluene for the Ag@SiO<sub>2</sub> (left) and that of hydrophobized with silane reagent (right). The hydrophobized particles are transferred in organic phase.

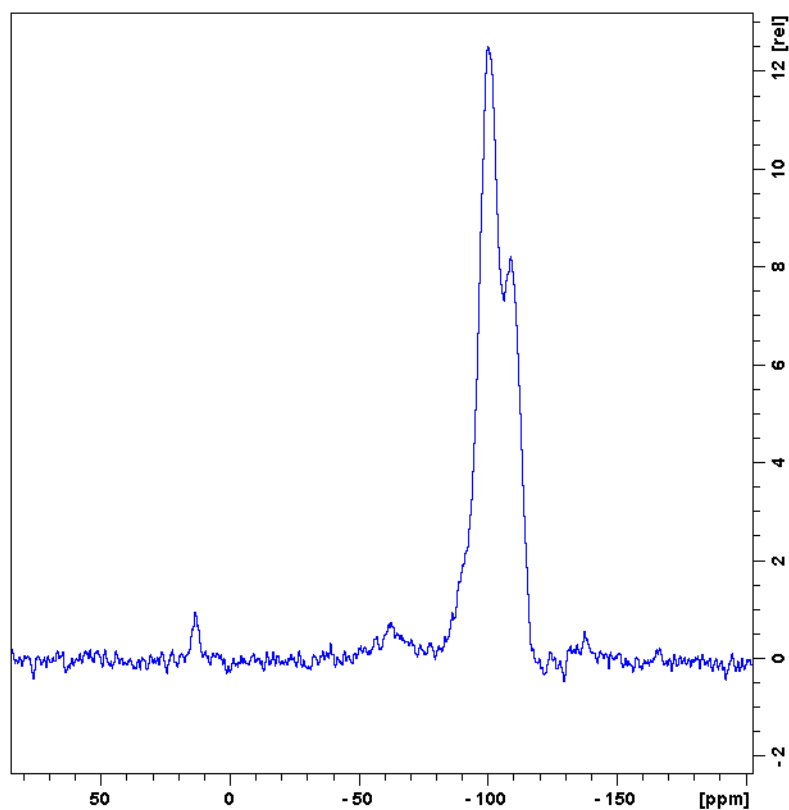

**Figure 2.** Solid-state <sup>29</sup>Si CP-MAS NMR spectrum of silver nanoparticles coated with silica shell and surface functionalized with octyl chains showing the chemical shift for the silicon nucleus of the surface-bound alkyl chains at  $\delta = 13$  ppm.

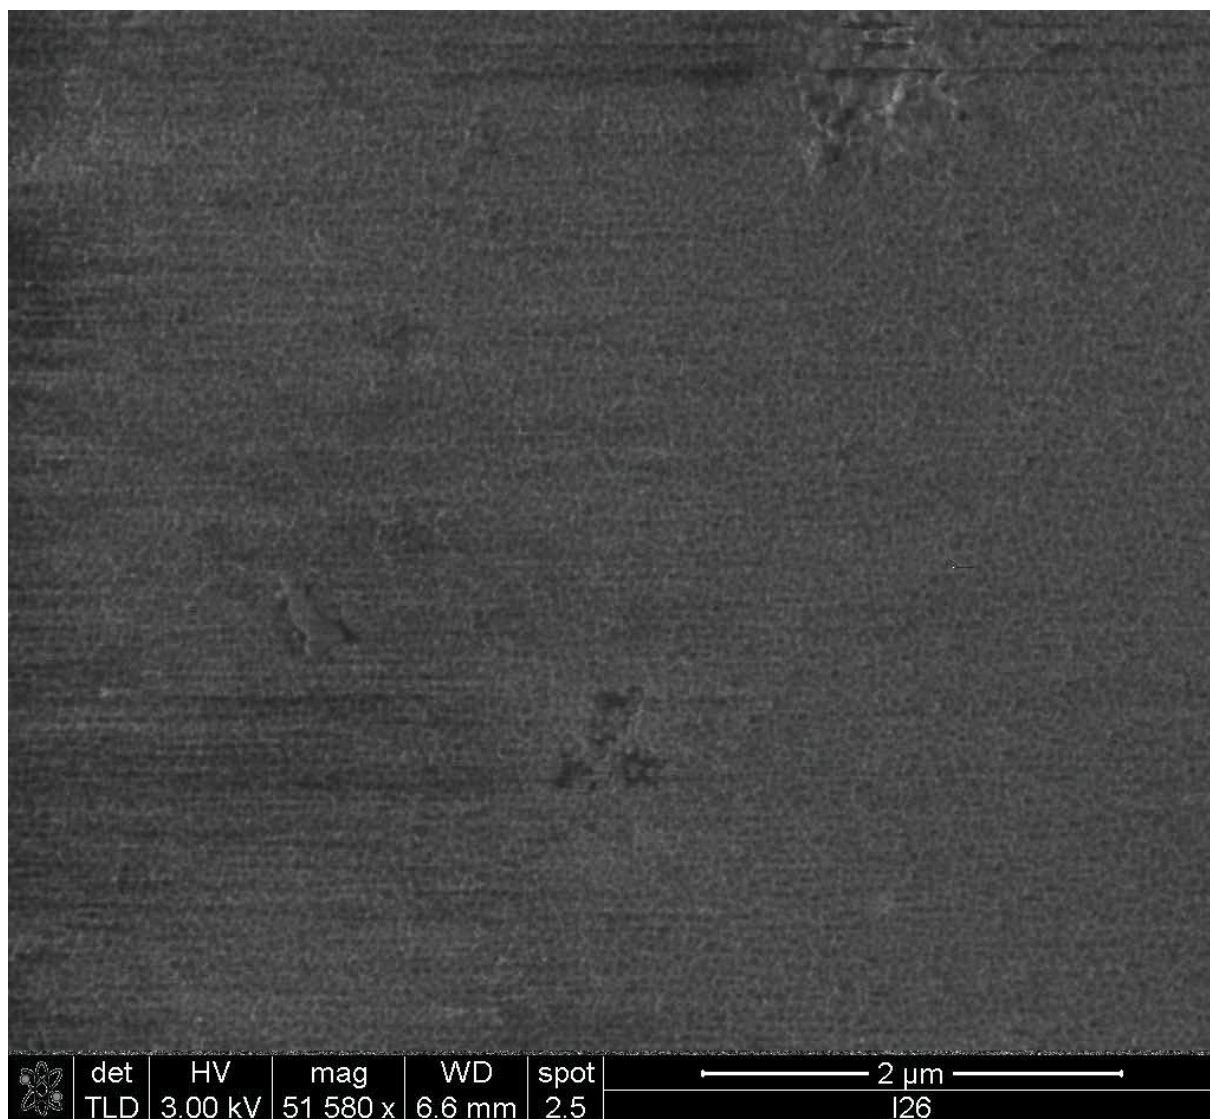

Figure 3. SEM image of Ag@SiO<sub>2</sub> (6.6 nm) powder in pressed pellet. The sample was measured in high vacuum mode using 3 kV and a TLD detector.

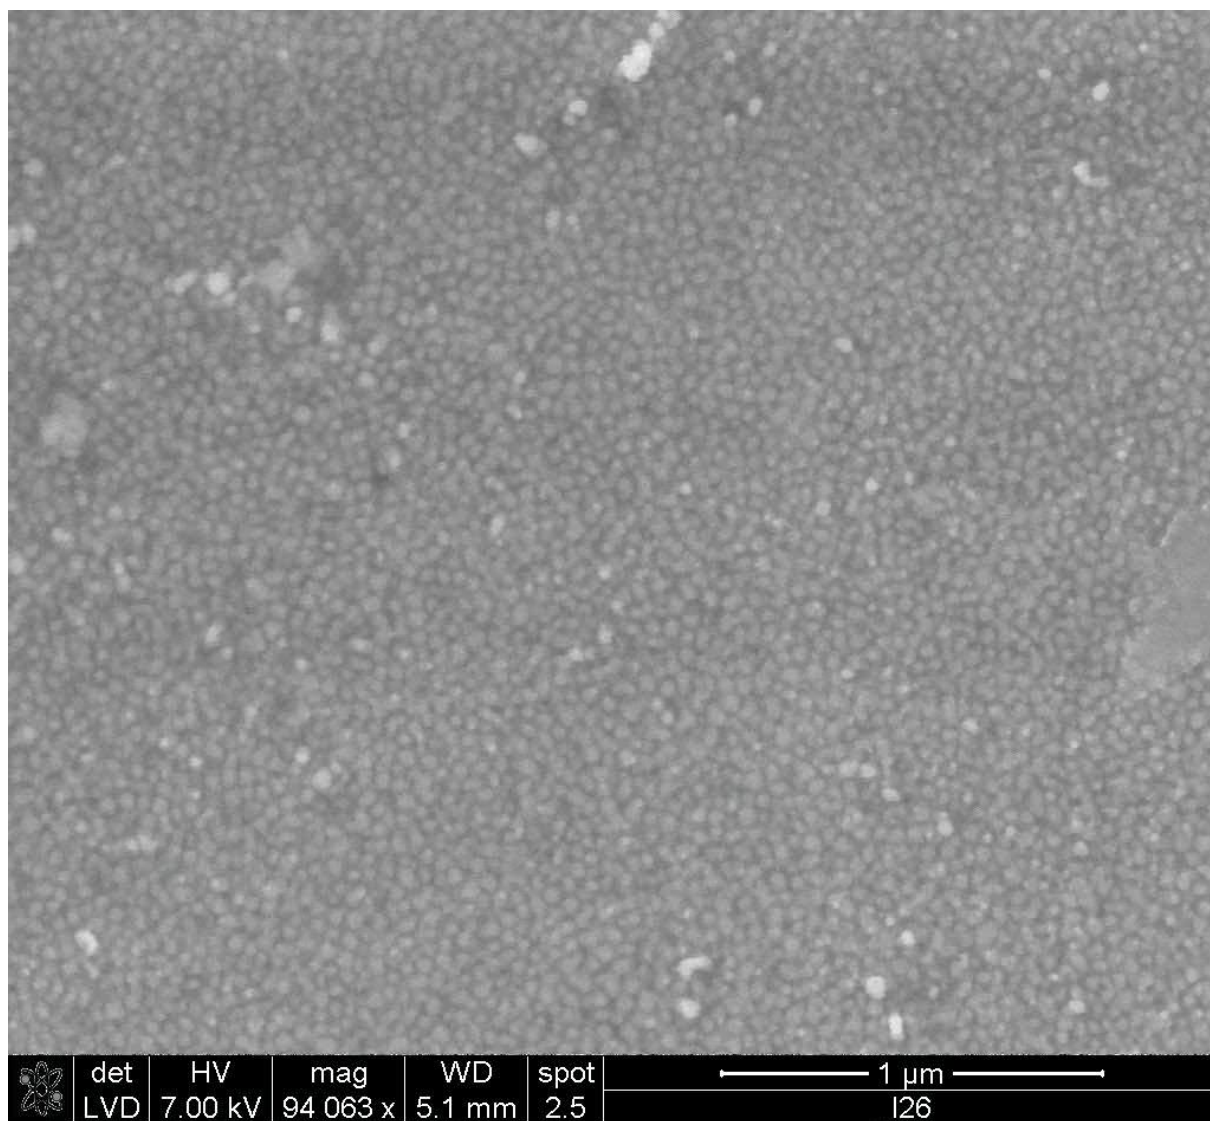

Figure 4. SEM image of Ag@SiO<sub>2</sub> (6.6 nm) powder in pressed pellet. The sample was measured in low vacuum mode using 7 kV and a LVD detector.

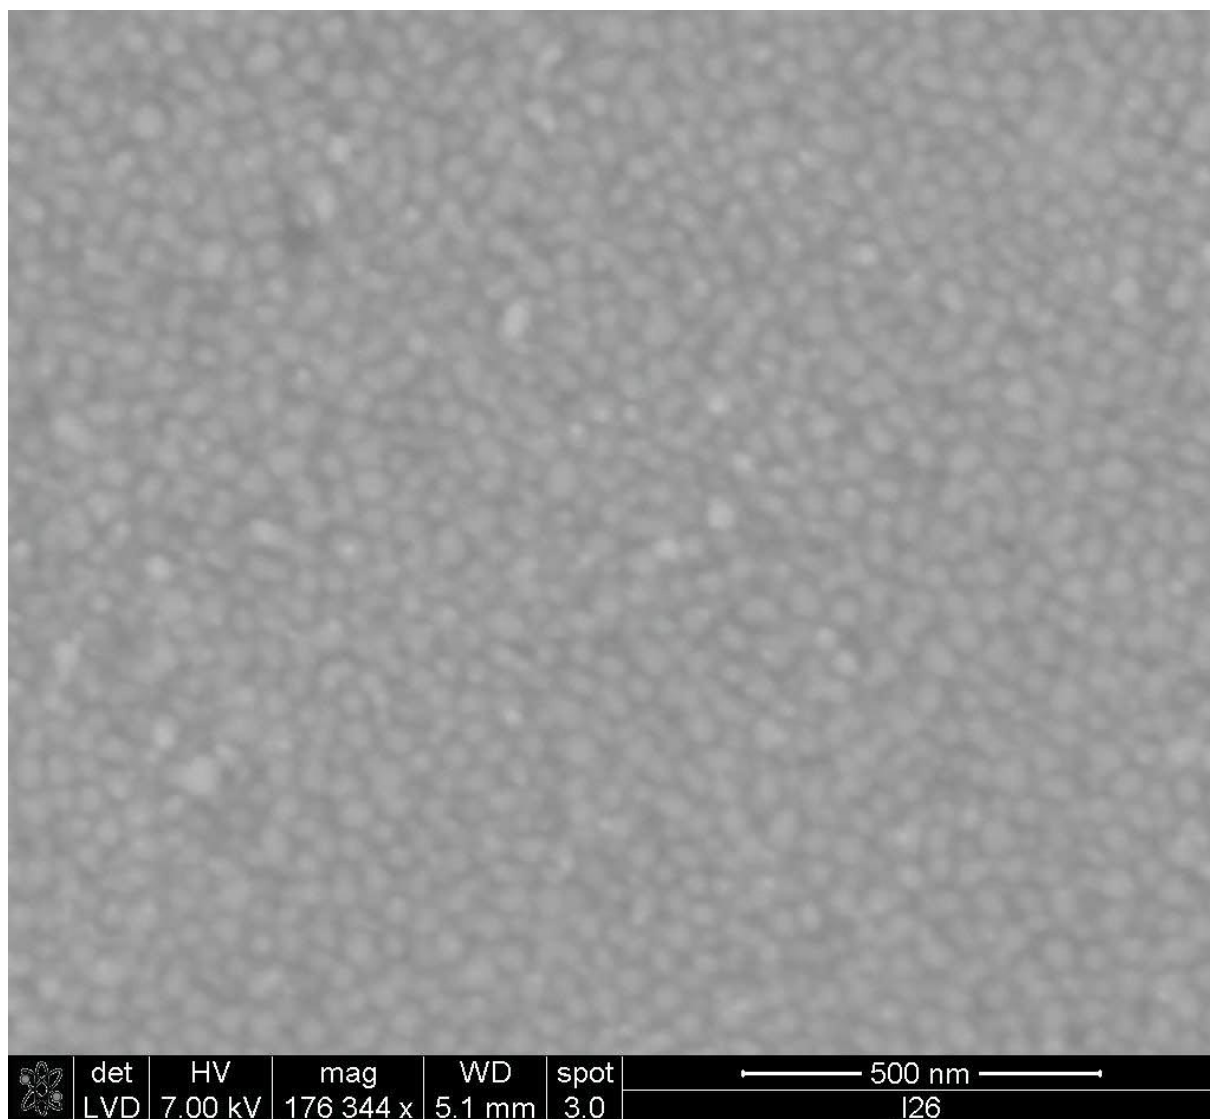

Figure 5. SEM image of Ag@SiO<sub>2</sub> (6.6 nm) powder in pressed pellet. The sample was measured in low vacuum mode using 7 kV and a LVD detector.
